# Supplementary material
Source: MDPI journal article supplement (https://www.mdpi.com/2073-4395/11/9/1796)
Supplement: s1 [file s1]

**Table S1.** Growth parameters of canola plants grown under hydroponic conditions and inoculated with root endophytic bacterial isolates.

| Isolate             | Species                             | SDW                                   | RDW        | SL                                    | RL          |
|---------------------|-------------------------------------|---------------------------------------|------------|---------------------------------------|-------------|
|                     |                                     | ----- (mg plant <sup>-1</sup> ) ----- |            | ----- (mm plant <sup>-1</sup> ) ----- |             |
| <i>Experiment 1</i> |                                     |                                       |            |                                       |             |
| Control             |                                     | 797                                   | 422        | 17.4                                  | 30.9        |
| MRBN09              | <i>Peribacillus simplex</i>         | 1013                                  | 468        | 19.5                                  | 27.4        |
| MRBN12              | <i>Bacillus taxi</i>                | 1050                                  | 543        | 18.8                                  | 23.8        |
| MRBN45              | <i>Paenibacillus polymyxa</i>       | <b>1088</b>                           | 501        | 19.6                                  | 24.7        |
| MRBN52              | <i>Paenibacillus</i> sp.            | <b>1077</b>                           | 481        | 18.9                                  | 27.7        |
| VABN05              | <i>Pseudomonas baetica</i>          | 1008                                  | 566        | 17.5                                  | 32.4        |
| VABN09              | <i>Pseudomonas baetica</i>          | 893                                   | 521        | 16.5                                  | 33.9        |
| VABN10              | <i>Pseudomonas baetica</i>          | 861                                   | 475        | 16.9                                  | 35.1        |
| VABN13              | <i>Pseudomonas baetica</i>          | 908                                   | 515        | 16.9                                  | 31.9        |
| VABN15              | <i>Pseudomonas thivervalensis</i>   | 903                                   | 522        | 16.9                                  | 29.6        |
| VABN17              | <i>Pseudomonas baetica</i>          | 900                                   | 522        | 17.1                                  | 30.4        |
| VABN20              | <i>Pseudomonas thivervalensis</i>   | <b>1107</b>                           | <b>605</b> | 19.5                                  | 30.1        |
| VABN21              | <i>Pseudomonas thivervalensis</i>   | <b>1149</b>                           | 397        | 20.6                                  | 30.0        |
| VABN23              | <i>Pseudomonas baetica</i>          | 1061                                  | 467        | 18.4                                  | 31.7        |
| <i>Experiment 2</i> |                                     |                                       |            |                                       |             |
| Control             |                                     | 734                                   | 376        | 16.6                                  | 25.5        |
| MRBN01              | <i>Paenibacillus amylolyticus</i>   | <b>1086</b>                           | 438        | 18.6                                  | 23.9        |
| MRBN02              | <i>Paenibacillus amylolyticus</i>   | <b>1059</b>                           | 450        | 18.6                                  | 27.1        |
| MRBN05              | <i>Paenibacillus amylolyticus</i>   | 913                                   | 397        | 18.1                                  | 23.1        |
| MRBN07              | <i>Terribacillus saccharophilus</i> | 1026                                  | 467        | 18.7                                  | 26.7        |
| MRBN17.1            | <i>Paenibacillus polymyxa</i>       | <b>1058</b>                           | 466        | 18.1                                  | 26.1        |
| MRBN17.2            | <i>Paenibacillus</i> sp.            | <b>1368</b>                           | <b>515</b> | <b>20.6</b>                           | <b>25.9</b> |
| MRBN18              | <i>Paenibacillus polymyxa</i>       | 924                                   | 435        | 16.9                                  | 27.9        |
| MRBN23              | <i>Paenibacillus polymyxa</i>       | <b>1047</b>                           | 462        | 17.7                                  | 25.2        |
| MRBN31              | <i>Paenibacillus polymyxa</i>       | <b>1164</b>                           | 410        | <b>20.8</b>                           | <b>30.6</b> |
| MRBN35              | <i>Paenibacillus polymyxa</i>       | <b>1054</b>                           | 475        | 17.9                                  | 27.0        |
| MRBN36              | <i>Paenibacillus polymyxa</i>       | <b>1086</b>                           | 472        | 18.6                                  | 28.9        |
| MRBN43              | <i>Paenibacillus amylolyticus</i>   | <b>1204</b>                           | <b>554</b> | 19.4                                  | 29.4        |
| MRBN47              | <i>Paenibacillus amylolyticus</i>   | <b>1233</b>                           | <b>547</b> | 19.9                                  | 26.1        |
| MRBN55              | <i>Paenibacillus</i> sp.            | <b>1411</b>                           | <b>581</b> | <b>22.0</b>                           | <b>25.9</b> |
| <i>Experiment 3</i> |                                     |                                       |            |                                       |             |
| Control             |                                     | 785                                   | 393        | 14.7                                  | 28.6        |
| MRBN03              | <i>Paenibacillus polymyxa</i>       | 712                                   | 283        | 14.9                                  | 24.7        |
| MRBN04              | <i>Bacillus megaterium</i>          | 831                                   | 482        | 15.4                                  | 28.5        |
| MRBN06              | <i>Paenibacillus massiliensis</i>   | 836                                   | 299        | 16.1                                  | 25.6        |
| MRBN15              | <i>Paenibacillus polymyxa</i>       | 826                                   | 303        | <b>16.9</b>                           | 27.7        |
| MRBN40              | <i>Bacillus megaterium</i>          | 625                                   | 278        | 14.7                                  | 25.3        |
| MRBN44              | <i>Paenibacillus polymyxa</i>       | 891                                   | 345        | <b>17.4</b>                           | 25.3        |
| MRBN48              | <i>Bacillus subtilis</i>            | 836                                   | 303        | 16.4                                  | 26.1        |
| MRBN49              | <i>Paenibacillus</i> sp.            | 747                                   | 339        | 12.6                                  | 26.3        |

|                     |                                   |             |            |             |      |
|---------------------|-----------------------------------|-------------|------------|-------------|------|
| MRBN50              | <i>Paenibacillus</i> sp.          | 641         | 215        | 16.5        | 29.1 |
| MRBN54              | <i>Bacillus taxi</i>              | 800         | 348        | 14.9        | 26.9 |
| <i>Experiment 4</i> |                                   |             |            |             |      |
| Control             |                                   | 749         | 298        | 14.6        | 30.6 |
| MRBN16              | <i>Paenibacillus</i> sp.          | 830         | 380        | 15.7        | 29.0 |
| MRBN21              | <i>Neobacillus</i> sp.            | 947         | 384        | <b>16.7</b> | 27.1 |
| MRBN26              | <i>Peribacillus simplex</i>       | <b>1138</b> | <b>447</b> | 16.4        | 25.4 |
| MRBN56              | <i>Peribacillus simplex</i>       | <b>1137</b> | <b>441</b> | 16.2        | 25.4 |
| VABN01              | <i>Pseudomonas baetica</i>        | 898         | 367        | 15.6        | 27.0 |
| VABN02              | <i>Pseudomonas baetica</i>        | 780         | 303        | <b>17.4</b> | 24.6 |
| VABN03              | <i>Pseudomonas baetica</i>        | 700         | 303        | 16.2        | 27.4 |
| VABN04              | <i>Pseudomonas baetica</i>        | 811         | 312        | 14.8        | 24.7 |
| VABN07              | <i>Pseudomonas thivervalensis</i> | <b>992</b>  | 393        | 15.9        | 23.1 |
| VABN08              | <i>Pseudomonas baetica</i>        | 770         | 301        | 13.4        | 26.0 |
| VABN22              | <i>Pseudomonas thivervalensis</i> | <b>1077</b> | <b>427</b> | <b>16.9</b> | 27.0 |

SDW, shoot dry weight; RDW, root dry weight; SL, shoot length; RL, root length. Means ( $n=7$ ) are shown. Within each experiment, treatment means in bold type were higher than their respective uninoculated control treatment according to Dunnett's one-tailed tests at  $p \leq 0.05$ .
